# Supplementary material
Source: Springer Nature journal article supplement (https://www.springermedizin.de/resource/supplementary/12958_2005_294_MOESM6_ESM.pdf/9567560)

ZAR1  
oocyte  
cDNA

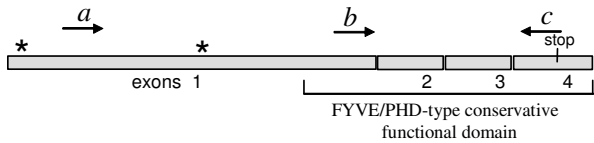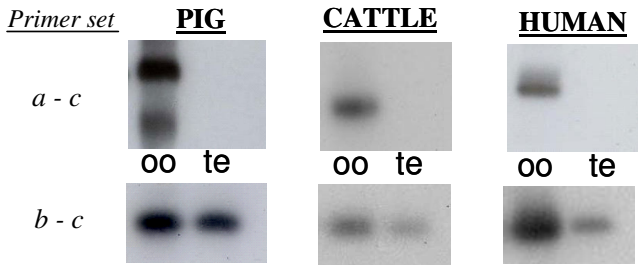

Supplement: MOESM6 [file 9567560]
